# Supplementary material for: The OceanFlux Greenhouse Gases methodology for deriving a sea surface climatology of CO 2 fugacity in support of air–sea gas flux studies
Source: Copernicus journal article supplement (doi:10.5194/os-11-519-2015), 2015-07-08
Supplement: Supplementary file 1 [file os-11-519-2015-supplement.zip]

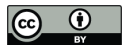

## *Supplement of*

# **The OceanFlux Greenhouse Gases methodology for deriving a sea surface climatology of CO<sub>2</sub> fugacity in support of air–sea gas flux studies**

**L. M. Goddijn-Murphy et al.**

*Correspondence to:* L. M. Goddijn-Murphy (lonneke.goddijn-murphy@uhi.ac.uk)

- os-11-519-2015-supplement-cover-letter.pdf
- supplement\_new
  - from\_SOCAT\_V1.5
    - \* 20100101\_OCF-CO2-GLO-1M-100-KRG-CLIM.nc
    - \* 20100201\_OCF-CO2-GLO-1M-100-KRG-CLIM.nc
    - \* 20100301\_OCF-CO2-GLO-1M-100-KRG-CLIM.nc
    - \* 20100401\_OCF-CO2-GLO-1M-100-KRG-CLIM.nc
    - \* 20100501\_OCF-CO2-GLO-1M-100-KRG-CLIM.nc
    - \* 20100601\_OCF-CO2-GLO-1M-100-KRG-CLIM.nc
    - \* 20100701\_OCF-CO2-GLO-1M-100-KRG-CLIM.nc
    - \* 20100801\_OCF-CO2-GLO-1M-100-KRG-CLIM.nc
    - \* 20100901\_OCF-CO2-GLO-1M-100-KRG-CLIM.nc
    - \* 20101001\_OCF-CO2-GLO-1M-100-KRG-CLIM.nc
    - \* 20101101\_OCF-CO2-GLO-1M-100-KRG-CLIM.nc
    - \* 20101201\_OCF-CO2-GLO-1M-100-KRG-CLIM.nc
  - from\_SOCAT\_V2
    - \* 20100101\_OCF-CO2-GLO-1M-100-KRG-CLIM.nc
    - \* 20100201\_OCF-CO2-GLO-1M-100-KRG-CLIM.nc
    - \* 20100301\_OCF-CO2-GLO-1M-100-KRG-CLIM.nc
    - \* 20100401\_OCF-CO2-GLO-1M-100-KRG-CLIM.nc
    - \* 20100501\_OCF-CO2-GLO-1M-100-KRG-CLIM.nc
    - \* 20100601\_OCF-CO2-GLO-1M-100-KRG-CLIM.nc
    - \* 20100701\_OCF-CO2-GLO-1M-100-KRG-CLIM.nc
    - \* 20100801\_OCF-CO2-GLO-1M-100-KRG-CLIM.nc
    - \* 20100901\_OCF-CO2-GLO-1M-100-KRG-CLIM.nc
    - \* 20101001\_OCF-CO2-GLO-1M-100-KRG-CLIM.nc
    - \* 20101101\_OCF-CO2-GLO-1M-100-KRG-CLIM.nc
    - \* 20101201\_OCF-CO2-GLO-1M-100-KRG-CLIM.nc

The copyright of individual parts of the supplement might differ from the CC-BY 3.0 licence.
